# Supplementary material for: Elucidating the mechanism behind the significant changes in photoluminescence behavior after powder compression into a tablet
Source: Royal Society of Chemistry journal article supplement (doi:10.1039/d4cp03897e), 2024-12-23
Supplement: d4cp03897e6.pdf [file d4cp03897e6.pdf]

## *Supporting Information*

# Elucidate the Mechanism of Changes in Emission Properties after Powder Compression into Tablets

Xiaoping, Lei<sup>[a]</sup>, Qingfeng Wu<sup>[a]</sup>, Xiangxi Zhang<sup>[a]</sup>, Qing Zhou<sup>[a,b,c]\*</sup> and Lingmin Yi<sup>[a]\*</sup>

[a] X. Lei, Q. Wu, X. Zhang, Prof. Q. Zhou and Prof. L. Yi

Engineering Research Center for Eco-Dyeing and Finishing of Textiles, Key Laboratory of Advanced Textile Materials and Manufacturing Technology, Ministry of Education, College of Textile Science and Engineering (International Institute of Silk), Zhejiang Sci-Tech University, Hangzhou 310018, People's Republic of China

[b] Prof. Q. Zhou

Zhejiang Sci-Tech University Shaoxing-Keqiao Research Institute, Building 8, Cross border E-commerce Park, Huashe Street, Keqiao District, Shaoxing City, Zhejiang, 312030, China

[c] Prof. Q. Zhou

MOE Key Laboratory of Macromolecular Synthesis and Functionalization, Department of Polymer Science and Engineering, Zhejiang University, Hangzhou, 310058, China

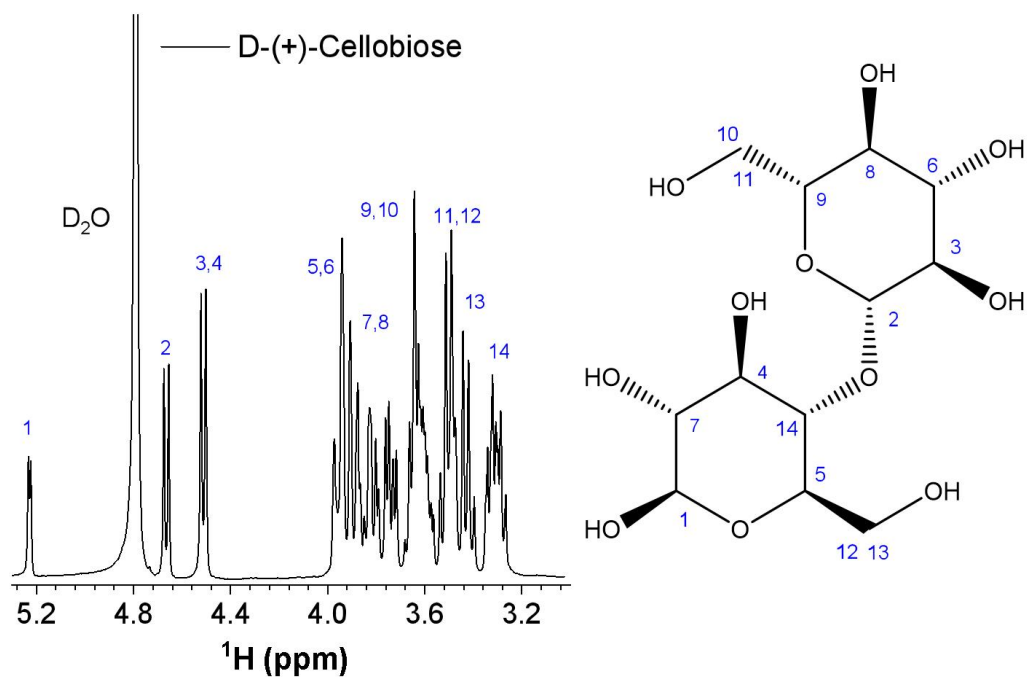

**Figure S1.**  $^1\text{H}$  NMR of D-Cbs powder.

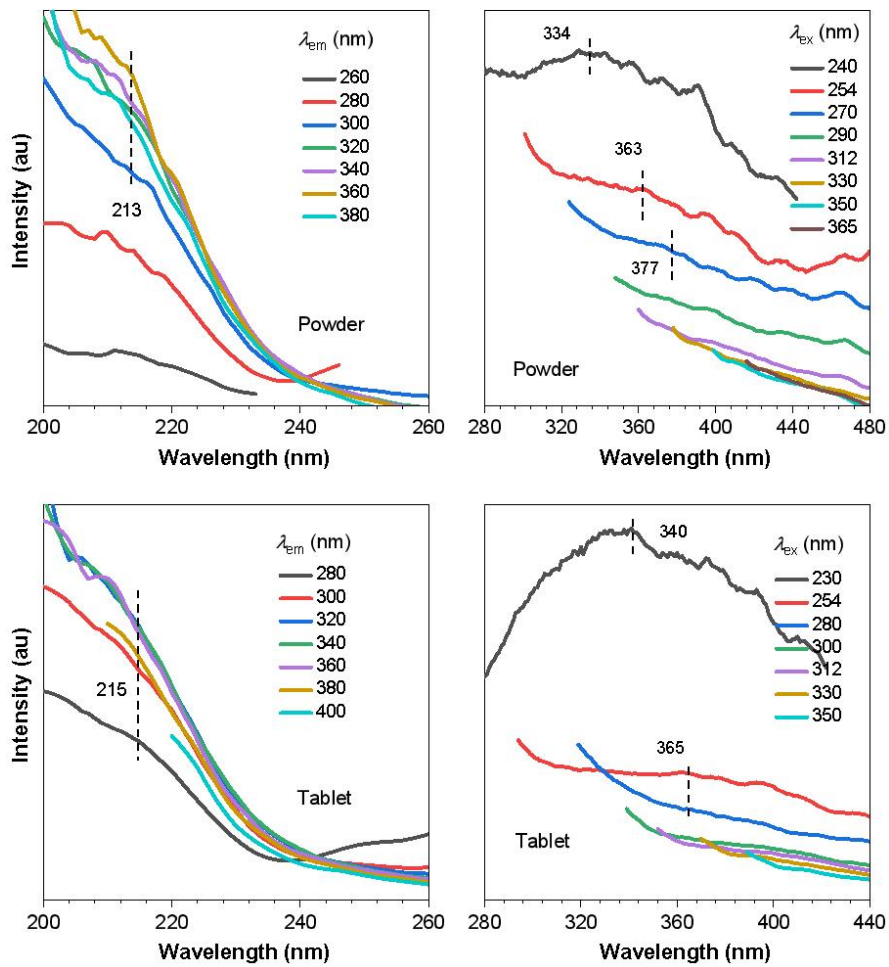

**Figure S2.** Excitation and emission spectra of powders and flakes at different excitation and emission wavelengths.

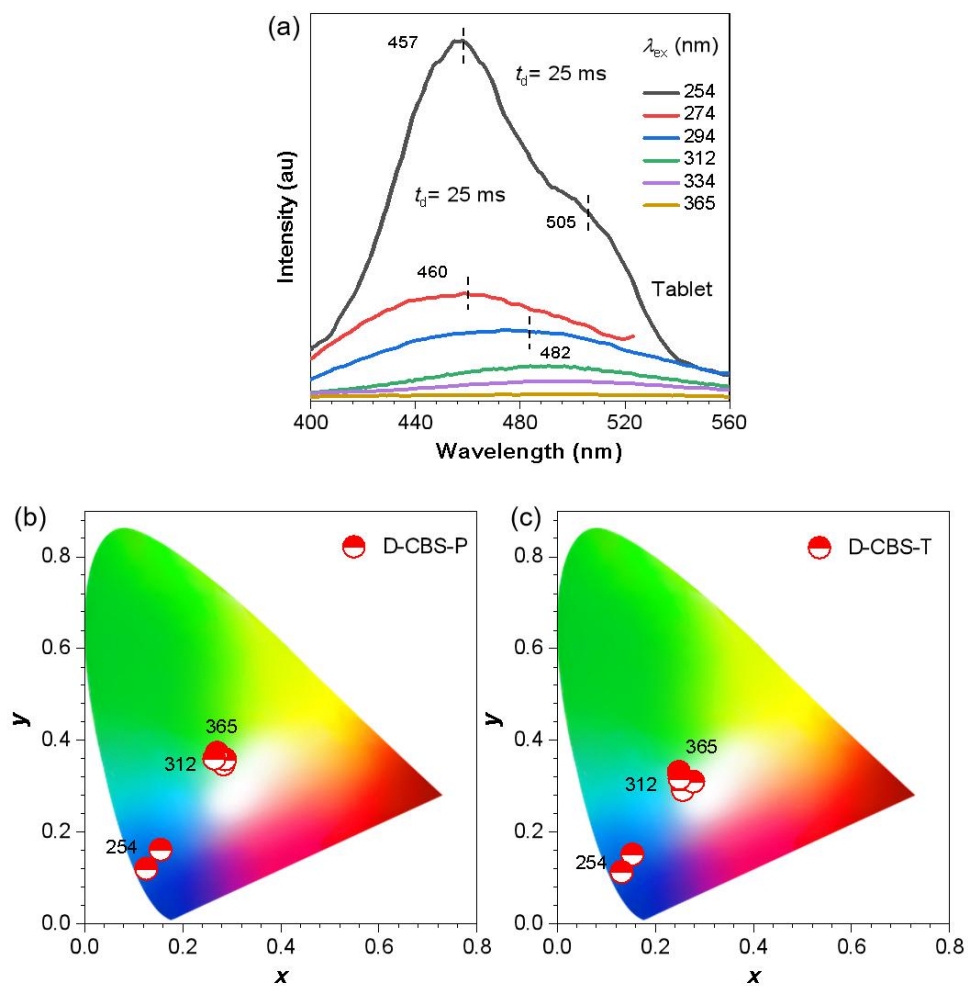

**Figure S3.** (a) Emission spectra of D-Cbs tablet under different excitations. (b) and (c) CIE coordinate diagram of the PL of emission under different excitations.

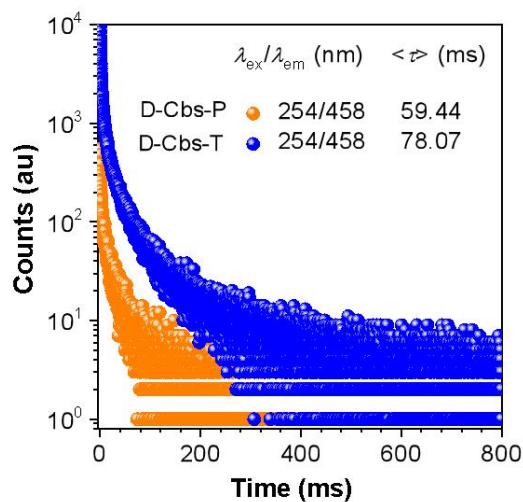

**Figure S4.** Lifetimes of D-Cbs powder and tablet at different excitation and emission wavelengths.

**Table S2.** Summary of the ns lifetimes of samples.<sup>a</sup>

|         | $\tau_1$<br>[ns] | $A_1$<br>[%] | $\tau_2$<br>[ns] | $A_2$<br>[%] | $\tau_3$<br>[ns] | $A_3$<br>[%] | $\tau$<br>[nds] | $\lambda_{\text{ex}}$<br>[nm] | $\lambda_{\text{em}}$<br>[nm] |
|---------|------------------|--------------|------------------|--------------|------------------|--------------|-----------------|-------------------------------|-------------------------------|
| D-Cbs-P | 1.39             | 17.79        | 14.24            | 47.82        | 59.44            | 34.39        | 27.50           | 254                           | 458                           |
| D-Cbs-T | 1.50             | 28.03        | 13.14            | 42.00        | 78.07            | 29.98        | 29.34           | 254                           | 458                           |

<sup>[a]</sup> All measurements were conducted at ambient conditions.  $\lambda_{\text{ex}}$  = excitation wavelength used for the lifetime measurement;  $\lambda_{\text{em}}$  = monitored emission wavelength.  $\tau = (A_1 \tau_1^2 + A_2 \tau_2^2 + A_3 \tau_3^2) / (A_1 \tau_1 + A_2 \tau_2 + A_3 \tau_3)$ .

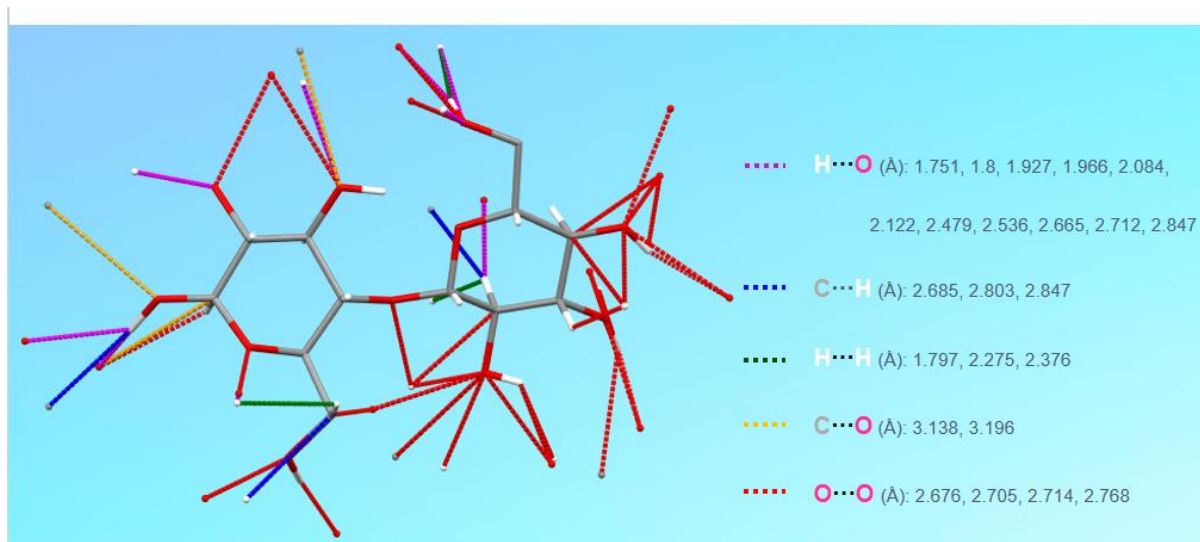

**Figure S5.** Intermolecular interaction of the D-Cbs molecule (numerical unit:Å).

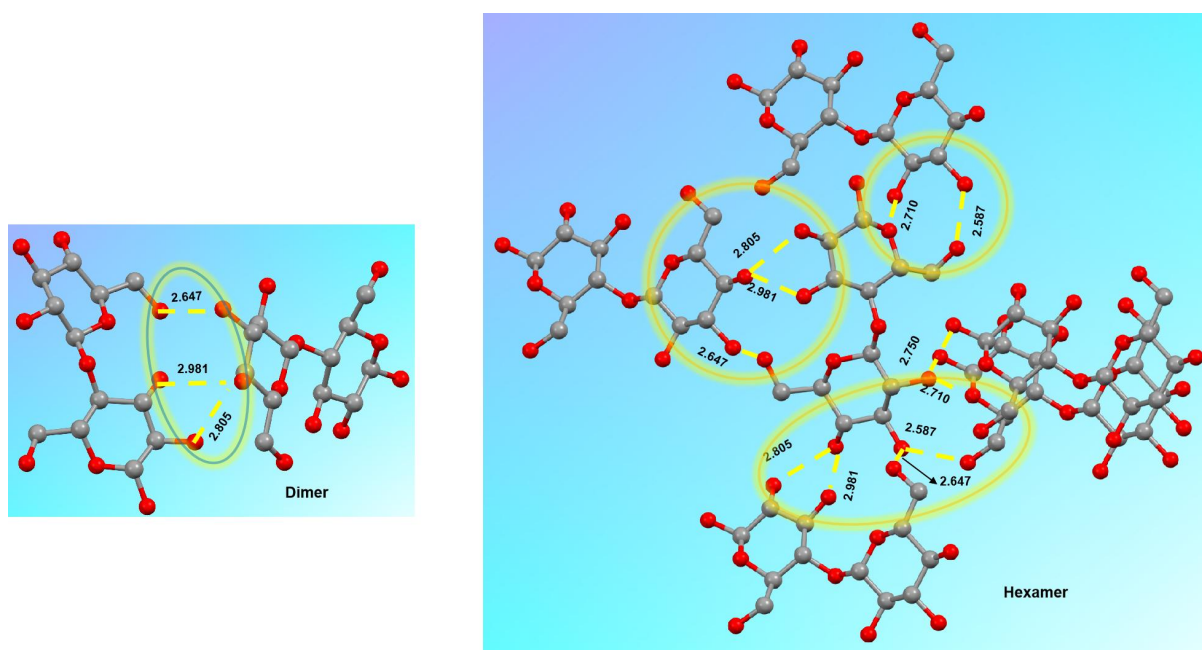

**Figure 6.** O...O interaction between dimer-p and hexamer-p coupling (numerical unit:Å).

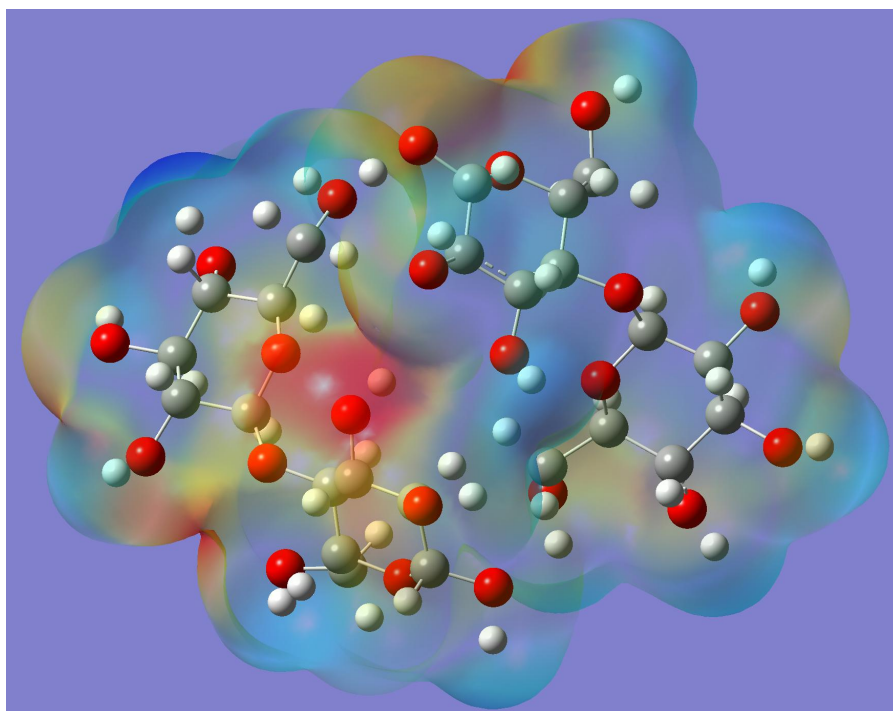

**Figure S7.** Electrostatic potential analysis of dimer-2-P of D-Cbs powder.

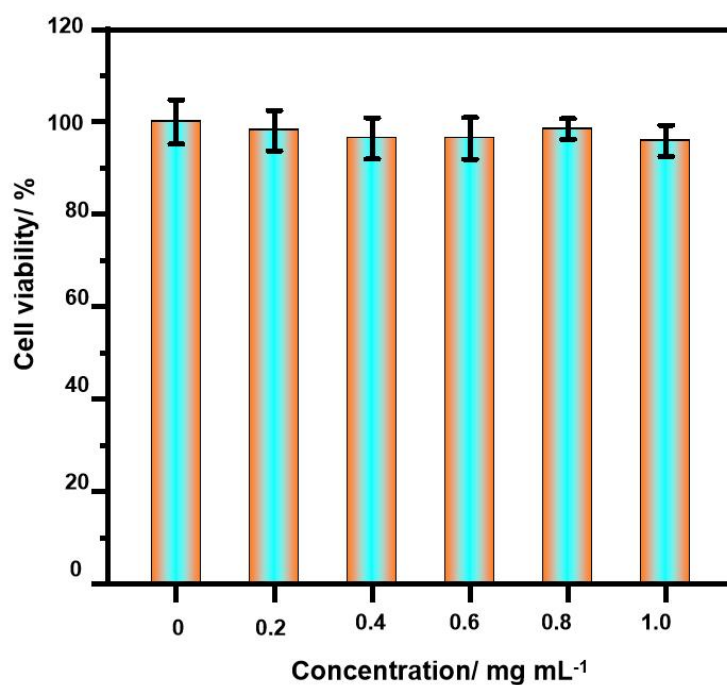

**Figure S8.** The viability of HeLa cells with the various concentrations of D-Cbs. Error bars  $\pm$  s.d. (n=5)

## The original calculation code used:

### 1) GROMACS software (version: 2020.6-MODIFIED)

```
title      = OPLS Lysozyme MD simulation
; Run parameters
integrator  = md          ; leap-frog integrator
nsteps     = 500000; 2 * 500000 = 1000 ps (1 ns)
dt         = 0.001      ; 2 fs
; Output control
nstxout    = 50000      ; save coordinates every 10.0 ps
nstvout    = 50000      ; save velocities every 10.0 ps
nstenergy  = 5000       ; save energies every 10.0 ps
nstlog     = 5000       ; update log file every 10.0 ps
nstxout-compressed = 5000 ; save compressed coordinates every 10.0 ps
                        ; nstxout-compressed replaces nstxtcout
compressed-x-grps = System ; replaces xtc-grps
; Bond parameters
continuation = yes      ; Restarting after NPT
constraint_algorithm = lincs ; holonomic constraints
constraints  = all-bonds ; all bonds (even heavy atom-H bonds) constrained
lincs_iter  = 1         ; accuracy of LINCS
lincs_order = 4         ; also related to accuracy
; Neighborsearching
cutoff-scheme = Verlet
ns_type      = grid    ; search neighboring grid cells
nstlist      = 10      ; 20 fs, largely irrelevant with Verlet scheme
rcoulomb     = 1.0     ; short-range electrostatic cutoff (in nm)
rvdw        = 1.0     ; short-range van der Waals cutoff (in nm)
; Electrostatics
coulombtype  = PME      ; Particle Mesh Ewald for long-range electrostatics
pme_order    = 4        ; cubic interpolation
fourierspacing = 0.16 ; grid spacing for FFT
; Temperature coupling is on
tcoupl      = V-rescale ; modified Berendsen thermostat
tc-grps     = system ; two coupling groups - more accurate
tau_t      = 0.1       ; time constant, in ps
ref_t      = 300       ; reference temperature, one for each group, in K
; Pressure coupling is on
pcoupl      = Parrinello-Rahman ; Pressure coupling on in NPT
pcoupltype  = semiisotropic ; uniform scaling of box vectors
tau_p      = 5.0       ; time constant, in ps
ref_p      = 40.0 40.0 ; reference pressure, in bar
compressibility = 0 4.5e-5 ; isothermal compressibility, bar^-1
; Periodic boundary conditions
pbc        = xyz      ; 3-D PBC
; Dispersion correction
DispCorr   = EnerPres ; account for cut-off vdW scheme
; Velocity generation
gen_vel    = no       ; Velocity generation is off
```

### 2) Orca 4.2 software



```
!D3 GCP(DFT/SV) b3lyp def2-SVP miniprint
%maxcore 1800
%opal nprocs 20 end
%tddft
nroots 5
dosoc true
tda false
printlevel 3
end
* xyz 0 1
```
